# Supplementary material
Source: ML conference proceedings conference paper supplement (https://openaccess.thecvf.com/content/WACV2023/html/Malla_DRAMA_Joint_Risk_WACV_2023_paper.html)
Supplement: Supplementary file 1 [file Malla_DRAMA_Joint_Risk_WACV_2023_supplemental.zip]

Archive with 2 entries (2 files):
- 0291-supp.pdf
- drama_video_anonymized.mp4
